# Supplementary material for: Tuning the optical bandgap and piezoresistance in iridium-based molecular semiconductors through ligand modification
Source: Royal Society of Chemistry journal article supplement (doi:10.1039/d1ma00416f), 2021-01-01
Supplement: d1ma00416f1.pdf [file d1ma00416f1.pdf]

## Tuning the optical bandgap and piezoresistance in iridium-based molecular semiconductors through ligand modification

Simone Eizagirre Barker,<sup>a,+</sup> Helen Benjamin,<sup>a,+</sup> Carole A. Morrison,<sup>a</sup> Sergejs Afanasjevs,<sup>b</sup> Gary Nichol,<sup>a</sup> Stephen Moggach,<sup>c</sup> Konstantin Kamenev,<sup>b</sup> and Neil Robertson<sup>a,\*</sup>

<sup>a</sup> EaStCHEM School of Chemistry, University of Edinburgh, Edinburgh, UK

<sup>b</sup> Centre for Science at Extreme Conditions, University of Edinburgh, Edinburgh, UK

<sup>c</sup> School of Molecular Sciences, The University of Western Australia, Crawley, Perth, Western Australia, Australia

\* Correspondence: neil.robertson@ed.ac.uk

| Contents                                                                   | Page |
|----------------------------------------------------------------------------|------|
| 1. FTIR spectra                                                            | S2   |
| 2. Tauc plots                                                              | S3   |
| 3. Band structure calculations                                             | S4   |
| 4. (TD-)DFT calculations                                                   | S4   |
| a. Predicted and measured absorption spectra in solution                   |      |
| b. Molecular orbital energies and & molecular orbital contributions        |      |
| c. Energy and composition of TD-DFT calculated singlet-singlet transitions |      |
| 5. NMR spectra                                                             | S18  |
| 6. Photographs of vapour-deposited films                                   | S22  |

## FTIR transmittance spectra

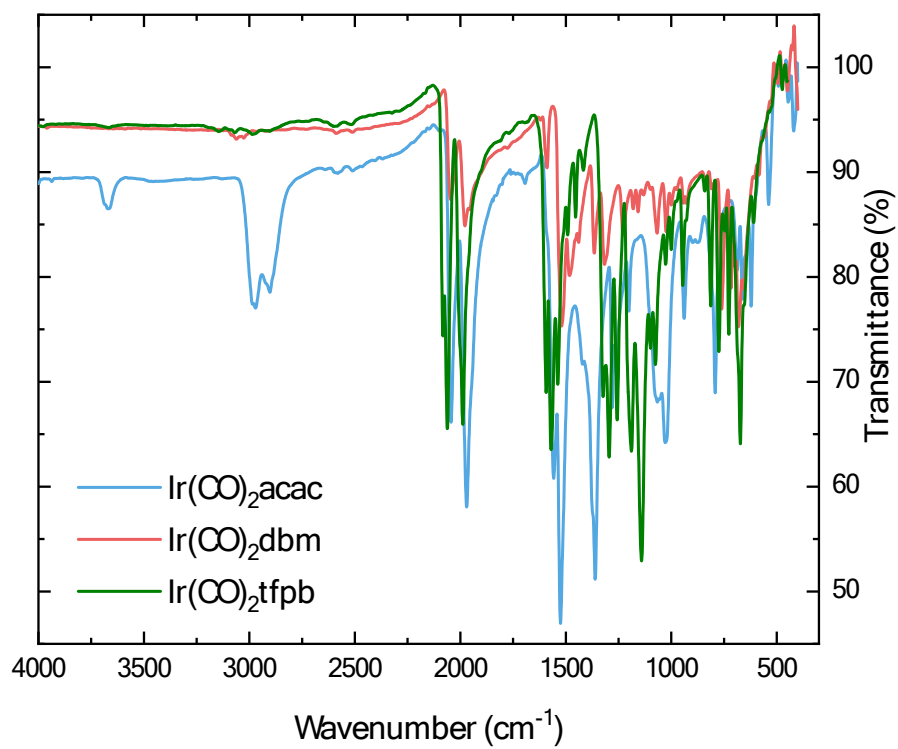

Figure S1: FTIR spectra of the complexes.

## Tauc plots from solid-state absorption spectra

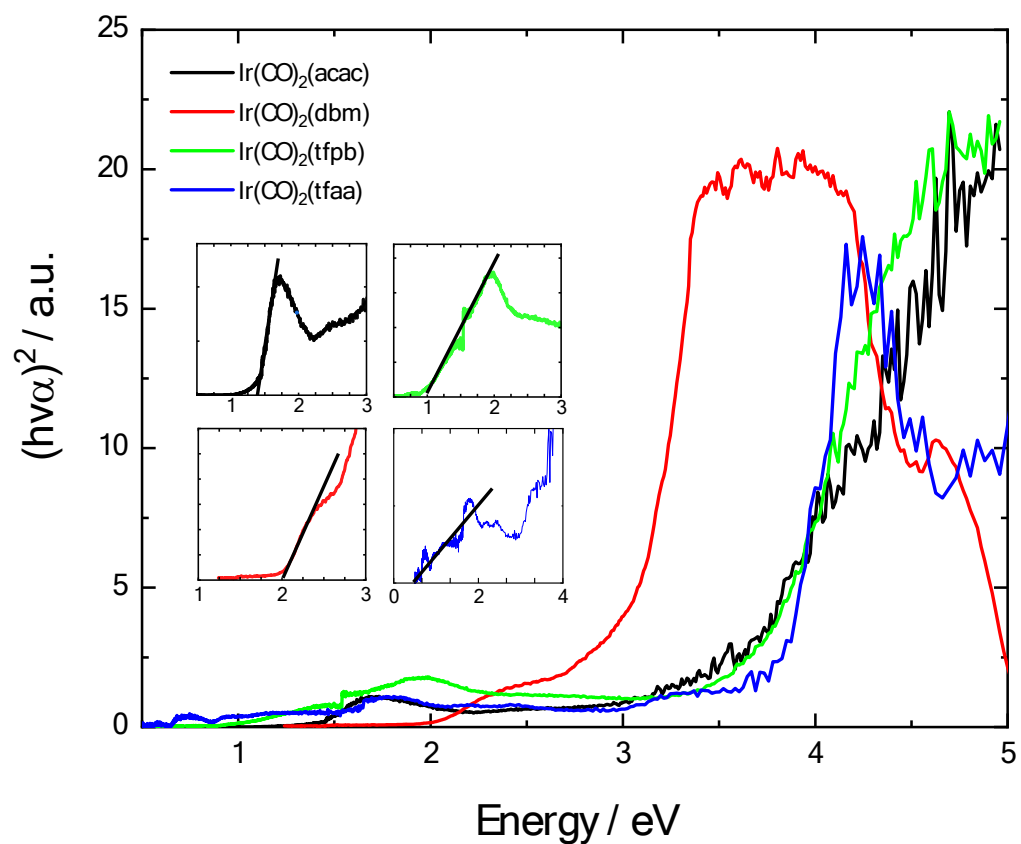

Figure S2: Estimating the optical bandgap. Tauc plots of the four complexes. The product of the absorbance  $\alpha$  and the incident photon energy squared  $(h\nu\alpha)^2$  is plotted against the incident photon energy ( $h\nu$ ). Insets show a zoomed-in view of the plots at low energies. Extrapolation of the linear regime at low energies (solid black lines) gives the energy of the bandgap at the x-axis intercept. Note that for Ir(CO)<sub>2</sub>tfpb, the discontinuity at 1.5 eV is an artefact from the spectrometer.

## Band-structure calculations

**Table S1:** Comparison of the optimised unit cell parameters under full geometry optimization.

|                                            |                                                   | <i>a</i> | <i>b</i> | <i>c</i> | $\alpha$ | $\beta$ | $\gamma$ | <i>V</i> |
|--------------------------------------------|---------------------------------------------------|----------|----------|----------|----------|---------|----------|----------|
| <b>Ir(CO)<sub>2</sub>acac</b> <sup>1</sup> | <i>C</i> <sup>exp</sup>                           | 6.533    | 7.787    | 9.277    | 105.970  | 90.475  | 100.663  | 445.054  |
|                                            | <i>C</i> <sup>cal</sup>                           | 6.531    | 7.663    | 9.026    | 106.142  | 90.160  | 101.437  | 424.520  |
|                                            | <i>V</i> <sup>cal</sup> / <i>V</i> <sup>exp</sup> |          |          |          |          |         |          | -4.61%   |
| <b>Ir(CO)<sub>2</sub>dbm</b>               | <i>C</i> <sup>exp</sup>                           | 8.306    | 11.303   | 16.271   | 96.266   | 97.677  | 100.017  | 1477.080 |
|                                            | <i>C</i> <sup>cal</sup>                           | 8.288    | 11.280   | 16.309   | 96.646   | 97.288  | 99.189   | 1478.427 |
|                                            | <i>V</i> <sup>cal</sup> / <i>V</i> <sup>exp</sup> |          |          |          |          |         |          | 0.09%    |

<sup>1</sup>Crystal parameters taken from reference <sup>4</sup>

## (TD-)DFT calculations

### Predicted and measured absorption spectra in solution

The absorption spectra of the complexes in solution were modelled by TD-DFT calculations and are shown in Figure S3 below. There is good agreement between observed and predicted spectra, with similar ordering of transitions for all complexes.

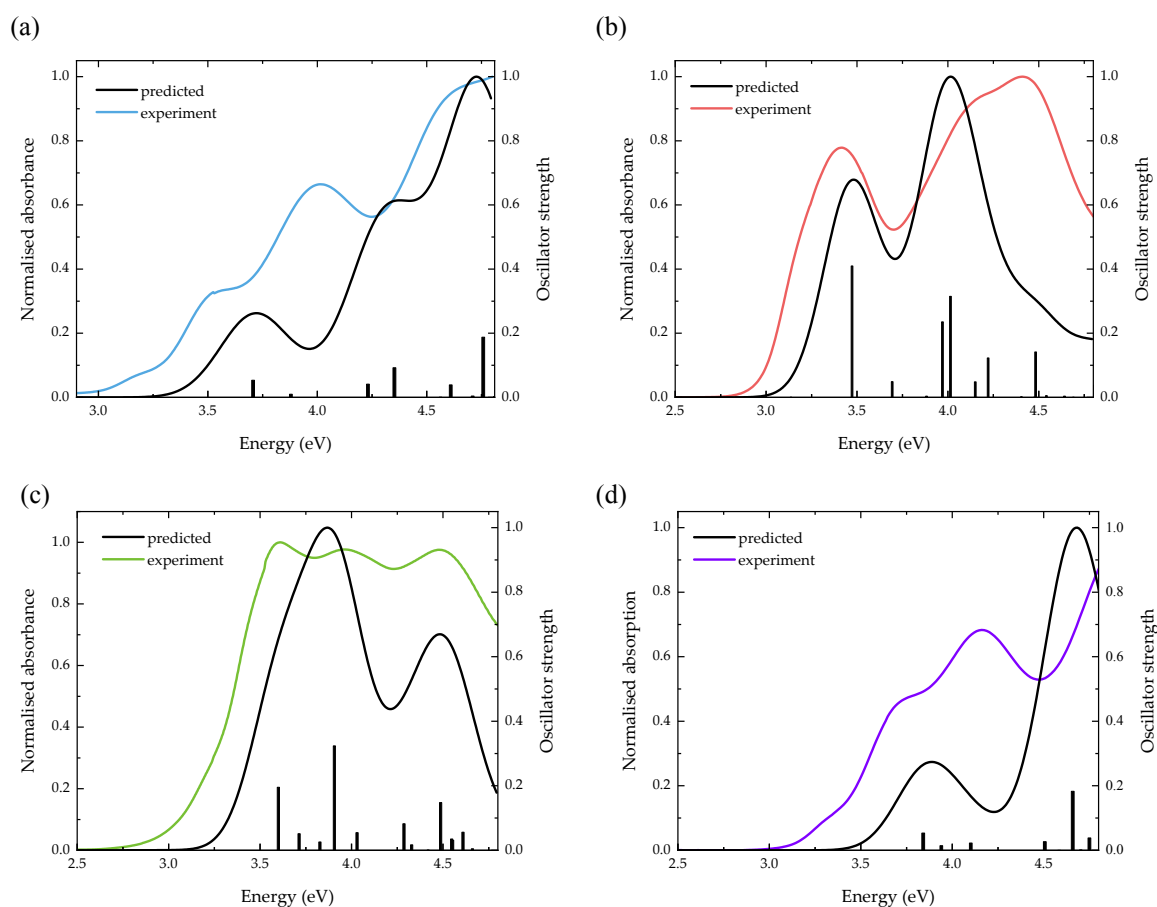

**Figure S3:** Optical transitions of the complexes in solution (a) *Ir(CO)<sub>2</sub>acac*, (b) *Ir(CO)<sub>2</sub>dbm*, (c) *Ir(CO)<sub>2</sub>tfpb*, (d) *Ir(CO)<sub>2</sub>tfaa*: predicted spectra along with strength of the electronic transitions calculated with TD-DFT (black curve) and experimental absorbance in hexane solution (colour).

**Table S2:** MO energies and % MO contributions from key groups for  $\text{Ir}(\text{CO})_2\text{acac}$ . 'Chelate' refers to the C, O and H atoms included on the chelated ring.

| Orbital No. |      | Energy (eV) | Ir | CO | chelate | CH <sub>3</sub> |
|-------------|------|-------------|----|----|---------|-----------------|
| 54          | L+4  | 0.23        | 14 | 84 | 2       | 0               |
| 53          | L+3  | -0.43       | 30 | 68 | 1       | 1               |
| 52          | L+2  | -1.07       | 30 | 64 | 5       | 1               |
| 51          | L+1  | -1.45       | 44 | 50 | 5       | 0               |
| 50          | LUMO | -1.75       | 1  | 3  | 86      | 10              |
| 49          | HOMO | -6.5        | 96 | 2  | 2       | 0               |
| 48          | H-1  | -6.71       | 19 | 9  | 70      | 1               |
| 47          | H-2  | -7.39       | 74 | 15 | 9       | 1               |
| 46          | H-3  | -7.8        | 57 | 12 | 28      | 3               |
| 45          | H-4  | -7.94       | 45 | 17 | 36      | 2               |

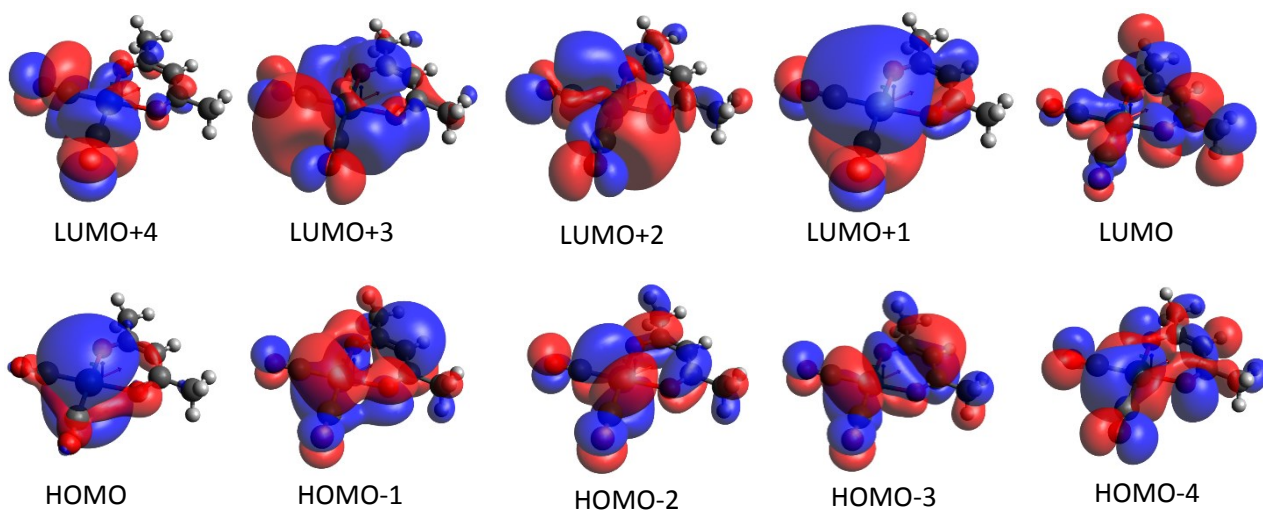

*Figure S4: Frontier molecular orbitals for  $\text{Ir}(\text{CO})_2\text{acac}$  (isocontour set at 0.01000)*

**Table S3:** MO energies and % MO contributions from key groups for  $\text{Ir}(\text{CO})_2\text{dbm}$ . 'Chelate' refers to the C, O and H atoms included on the chelated ring.

| Orbital No. |      | Energy (eV) | Ir | CO | chelate | Ph |
|-------------|------|-------------|----|----|---------|----|
| 86          | L+4  | -0.59       | 0  | 0  | 1       | 99 |
| 85          | L+3  | -0.91       | 8  | 9  | 10      | 73 |
| 84          | L+2  | -1.08       | 30 | 64 | 5       | 1  |
| 83          | L+1  | -1.53       | 37 | 42 | 9       | 11 |
| 82          | LUMO | -2.43       | 1  | 2  | 57      | 40 |
| 81          | HOMO | -6.51       | 96 | 2  | 2       | 0  |
| 80          | H-1  | -6.54       | 9  | 5  | 62      | 25 |
| 79          | H-2  | -7.09       | 35 | 8  | 10      | 47 |
| 78          | H-3  | -7.2        | 29 | 9  | 8       | 54 |
| 77          | H-4  | -7.34       | 2  | 0  | 1       | 97 |

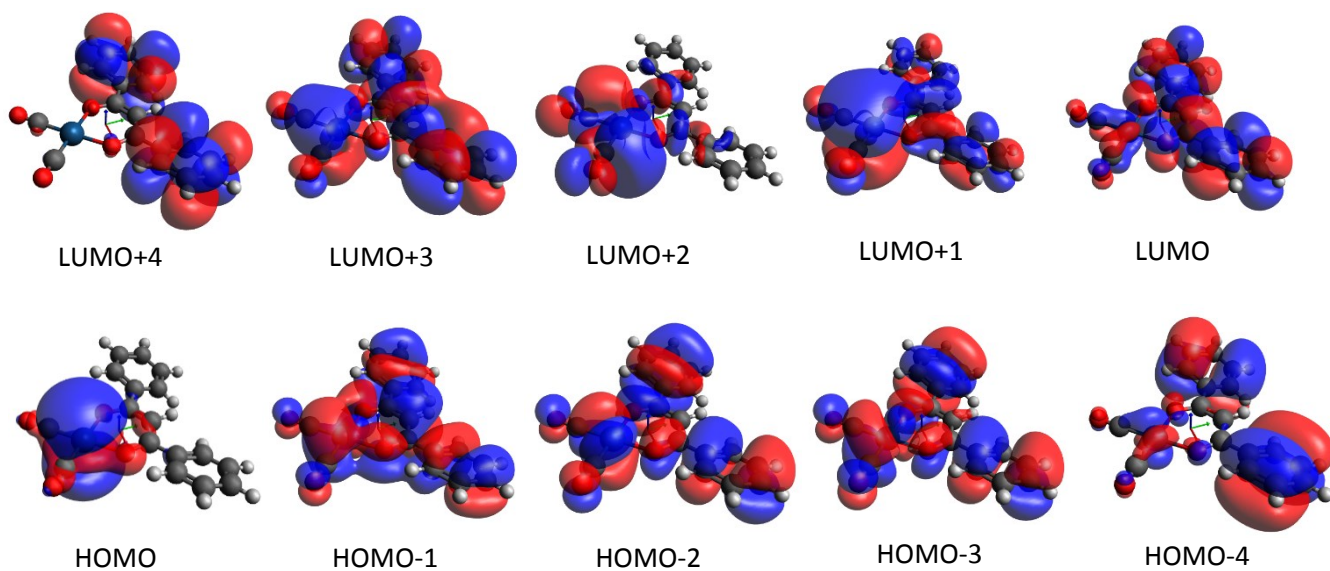

*Figure S5:* Frontier molecular orbitals for  $\text{Ir}(\text{CO})_2\text{dbm}$  (isocontour set at 0.01000)

**Table S4:** MO energies and % MO contributions from key groups for  $\text{Ir}(\text{CO})_2\text{tfpb}$ . 'Chelate' refers to the C, O and H atoms included on the chelated ring.

| Orbital No. |      | Energy (eV) | Ir | CO | chelate | CF3 | Ph |
|-------------|------|-------------|----|----|---------|-----|----|
| 82          | L+4  | -0.66       | 27 | 67 | 1       | 0   | 4  |
| 81          | L+3  | -0.84       | 2  | 2  | 5       | 1   | 91 |
| 80          | L+2  | -1.35       | 31 | 62 | 5       | 1   | 1  |
| 79          | L+1  | -1.71       | 41 | 49 | 8       | 0   | 2  |
| 78          | LUMO | -2.76       | 1  | 2  | 67      | 3   | 27 |
| 77          | HOMO | -6.75       | 96 | 2  | 2       | 0   | 0  |
| 76          | H-1  | -7.02       | 18 | 7  | 57      | 0   | 18 |
| 75          | H-2  | -7.4        | 36 | 9  | 10      | 0   | 44 |
| 74          | H-3  | -7.58       | 5  | 1  | 1       | 0   | 92 |
| 73          | H-4  | -7.89       | 60 | 12 | 10      | 1   | 18 |

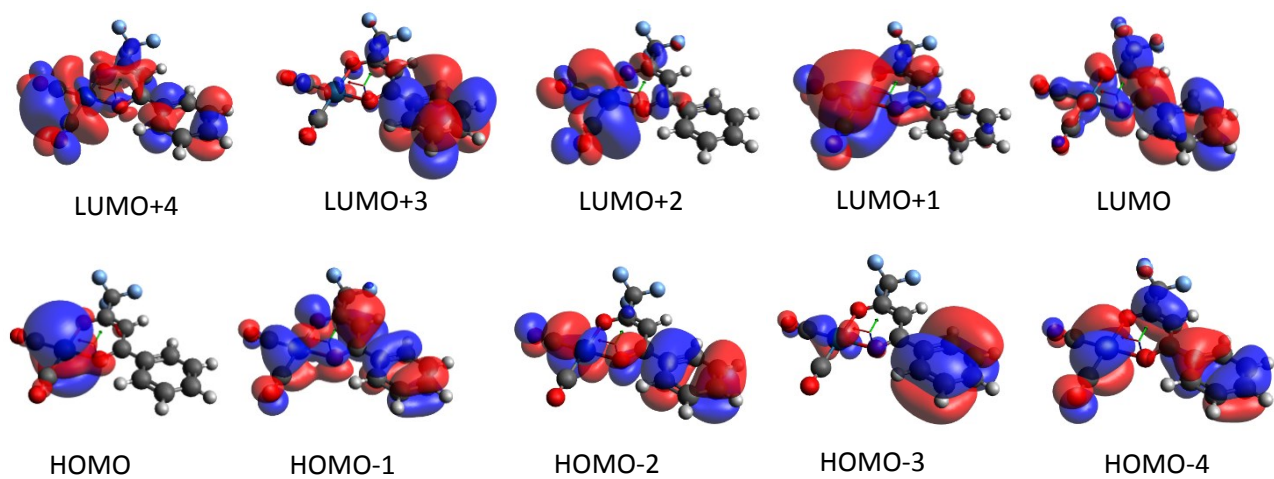

**Figure S6:** Frontier molecular orbitals for  $\text{Ir}(\text{CO})_2\text{tfpb}$  (isocontour set at 0.01500)

**Table S5:** MO energies and % MO contributions from key groups for  $\text{Ir}(\text{CO})_2\text{tfaa}$ . 'Chelate' refers to the C, O and H atoms included on the chelated ring.

| Orbital No. |      | Energy (eV) | Ir | CO | chelate | CF <sub>3</sub> | CH <sub>3</sub> |
|-------------|------|-------------|----|----|---------|-----------------|-----------------|
| 66          | L+4  | -0.03       | 14 | 85 | 1       | 0               | 0               |
| 65          | L+3  | -0.7        | 29 | 70 | 1       | 0               | 1               |
| 64          | L+2  | -1.39       | 32 | 62 | 5       | 1               | 1               |
| 63          | L+1  | -1.72       | 43 | 51 | 6       | 0               | 0               |
| 62          | LUMO | -2.46       | 1  | 3  | 86      | 6               | 5               |
| 61          | HOMO | -6.79       | 96 | 3  | 2       | 0               | 0               |
| 60          | H-1  | -7.16       | 27 | 11 | 61      | 0               | 0               |
| 59          | H-2  | -7.73       | 76 | 15 | 8       | 0               | 1               |
| 58          | H-3  | -8.24       | 51 | 9  | 37      | 1               | 1               |
| 57          | H-4  | -8.32       | 46 | 17 | 35      | 0               | 2               |

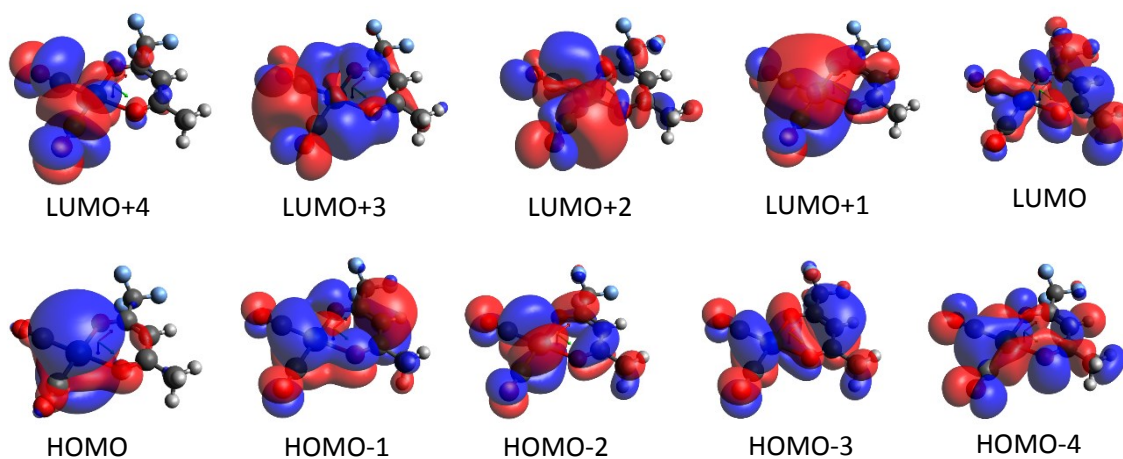

**Figure S7:** Frontier molecular orbitals for  $\text{Ir}(\text{CO})_2\text{tfaa}$  (isocontour set at 0.01000)



**Table S6:** Energy and composition of TD-DFT calculated singlet-singlet transitions of *Ir(CO)<sub>2</sub>acac*:

| No. | Wavelength (nm) | Osc. Strength | Major contribs                                 | Minor contribs                                               | Ir            | CO           | chelate      | Ch3          |
|-----|-----------------|---------------|------------------------------------------------|--------------------------------------------------------------|---------------|--------------|--------------|--------------|
| 1   | 327.2819        | 0             | HOMO->LUMO (100%)                              |                                                              | 96-->1 (-95)  | 2-->3 (1)    | 2-->86 (84)  | 0-->10 (10)  |
| 2   | 323.7354        | 0.0534        | HOMO->L+1 (97%)                                |                                                              | 96-->44 (-52) | 2-->50 (48)  | 2-->5 (3)    | 0-->0 (0)    |
| 3   | 309.3418        | 0.0099        | HOMO->L+2 (96%)                                |                                                              | 96-->30 (-66) | 2-->64 (62)  | 2-->5 (3)    | 0-->1 (1)    |
| 4   | 283.6128        | 0.0412        | H-1->LUMO (88%)                                | H-3->LUMO (4%), H-2->L+1 (5%)                                | 24-->3 (-21)  | 9-->6 (-3)   | 65-->82 (17) | 2-->10 (8)   |
| 5   | 275.7288        | 0.0923        | H-1->L+1 (86%)                                 | H-2->LUMO (3%), HOMO->L+3 (6%)                               | 26-->42 (16)  | 9-->50 (41)  | 64-->8 (-56) | 1-->1 (0)    |
| 6   | 273.4966        | 0             | H-1->L+2 (90%)                                 | H-3->L+2 (8%)                                                | 23-->30 (7)   | 9-->64 (55)  | 67-->5 (-62) | 2-->1 (-1)   |
| 7   | 262.996         | 0.0003        | HOMO->L+3 (91%)                                |                                                              | 91-->31 (-60) | 3-->67 (64)  | 6-->1 (-5)   | 0-->1 (1)    |
| 8   | 260.3343        | 0.0388        | H-2->L+1 (84%)                                 | H-4->L+2 (3%), H-3->LUMO (5%), H-1->LUMO (3%)                | 70-->40 (-30) | 15-->46 (31) | 13-->13 (0)  | 2-->1 (-1)   |
| 9   | 254.8074        | 0.0043        | H-2->L+2 (82%), H-1->L+3 (11%)                 | H-3->L+3 (4%)                                                | 67-->30 (-37) | 14-->65 (51) | 17-->4 (-13) | 2-->1 (-1)   |
| 10  | 252.2106        | 0.1878        | H-2->LUMO (95%)                                | H-1->L+1 (3%)                                                | 73-->2 (-71)  | 15-->5 (-10) | 11-->84 (73) | 1-->10 (9)   |
| 11  | 249.405         | 0.0026        | H-5->LUMO (98%)                                |                                                              | 1-->1 (0)     | 7-->3 (-4)   | 77-->86 (9)  | 15-->10 (-5) |
| 12  | 244.6799        | 0             | H-4->LUMO (97%)                                |                                                              | 45-->1 (-44)  | 17-->3 (-14) | 36-->86 (50) | 2-->10 (8)   |
| 13  | 240.7694        | 0.0001        | H-4->L+1 (64%), H-1->L+3 (27%)                 | H-3->L+3 (3%), H-2->L+2 (2%)                                 | 39-->39 (0)   | 15-->56 (41) | 45-->4 (-41) | 2-->1 (-1)   |
| 14  | 233.7208        | 0             | HOMO->L+4 (94%)                                |                                                              | 95-->15 (-80) | 3-->83 (80)  | 2-->2 (0)    | 0-->0 (0)    |
| 15  | 232.7686        | 0.003         | H-4->L+1 (32%), H-2->L+2 (12%), H-1->L+3 (53%) |                                                              | 34-->35 (1)   | 12-->62 (50) | 52-->3 (-49) | 2-->1 (-1)   |
| 16  | 232.607         | 0.0126        | HOMO->L+5 (86%)                                | H-3->LUMO (7%), HOMO->L+8 (3%)                               | 93-->35 (-58) | 3-->52 (49)  | 4-->9 (5)    | 0-->5 (5)    |
| 17  | 228.977         | 0.1836        | H-3->LUMO (80%)                                | H-4->L+2 (2%), H-2->L+1 (2%), H-1->LUMO (6%), HOMO->L+5 (6%) | 58-->5 (-53)  | 11-->9 (-2)  | 29-->77 (48) | 3-->9 (6)    |
| 18  | 227.4856        | 0.0005        | H-3->L+1 (89%)                                 |                                                              | 57-->43 (-14) | 12-->52 (40) | 28-->5 (-23) | 3-->0 (-3)   |
| 19  | 225.7008        | 0             | H-2->L+3 (81%)                                 | H-3->L+5 (4%), H-1->L+5 (9%)                                 | 68-->31 (-37) | 14-->67 (53) | 16-->1 (-15) | 2-->1 (-1)   |
| 20  | 222.9972        | 0             | H-3->L+2 (85%)                                 |                                                              | 55-->29 (-26) | 11-->64 (53) | 31-->5 (-26) | 3-->1 (-2)   |
| 21  | 221.349         | 0.0096        | H-4->L+2 (70%), H-1->L+4 (15%)                 | H-4->L+5 (4%), H-3->L+4 (4%)                                 | 41-->27 (-14) | 15-->68 (53) | 41-->4 (-37) | 2-->1 (-1)   |
| 22  | 216.6912        | 0             | H-5->L+1 (98%)                                 |                                                              | 1-->44 (43)   | 7-->50 (43)  | 77-->5 (-72) | 15-->0 (-15) |
| 23  | 209.0972        | 0             | H-2->L+3 (13%), H-1->L+5 (75%)                 | H-3->L+5 (7%)                                                | 30-->36 (6)   | 10-->59 (49) | 59-->3 (-56) | 2-->2 (0)    |
| 24  | 200.9957        | 0.1368        | H-5->L+2 (94%)                                 |                                                              | 1-->30 (29)   | 7-->64 (57)  | 77-->5 (-72) | 15-->1 (-14) |

|    |          |        |                                                |                                              |               |              |               |              |
|----|----------|--------|------------------------------------------------|----------------------------------------------|---------------|--------------|---------------|--------------|
| 25 | 199.7039 | 0.0001 | H-3->L+3 (41%), H-2->L+5 (49%)                 | H-1->L+3 (4%), H-1->L+6 (2%)                 | 64-->34 (-30) | 13-->61 (48) | 21-->2 (-19)  | 2-->3 (1)    |
| 26 | 199.3668 | 0.0877 | H-4->L+5 (17%), H-1->L+4 (69%)                 | H-4->L+2 (7%), H-2->L+1 (2%)                 | 27-->20 (-7)  | 11-->77 (66) | 60-->2 (-58)  | 2-->1 (-1)   |
| 27 | 197.8808 | 0.0015 | H-3->L+3 (43%), H-2->L+5 (45%)                 | H-1->L+3 (4%), H-1->L+6 (3%)                 | 62-->34 (-28) | 13-->61 (48) | 22-->2 (-20)  | 2-->3 (1)    |
| 28 | 196.0379 | 0.0021 | H-4->L+3 (44%), H-2->L+4 (44%)                 | H-5->L+2 (4%), HOMO->L+6 (5%)                | 59-->24 (-35) | 15-->72 (57) | 24-->2 (-22)  | 2-->2 (0)    |
| 29 | 190.6511 | 0.0578 | HOMO->L+6 (90%)                                | H-4->L+3 (3%), H-2->L+4 (2%), HOMO->L+9 (2%) | 93-->53 (-40) | 3-->11 (8)   | 3-->11 (8)    | 0-->24 (24)  |
| 30 | 188.1399 | 0      | H-6->LUMO (91%)                                | H-4->L+4 (5%)                                | 32-->1 (-31)  | 10-->8 (-2)  | 45-->81 (36)  | 12-->10 (-2) |
| 31 | 186.7091 | 0.0001 | H-1->L+6 (88%)                                 | H-3->L+3 (5%), HOMO->L+7 (4%)                | 25-->55 (30)  | 9-->11 (2)   | 65-->10 (-55) | 1-->23 (22)  |
| 32 | 185.0731 | 0.1063 | HOMO->L+7 (94%)                                | H-1->L+6 (4%)                                | 92-->77 (-15) | 2-->16 (14)  | 5-->1 (-4)    | 0-->6 (6)    |
| 33 | 182.3082 | 0.0148 | H-5->L+3 (83%)                                 | H-4->L+5 (6%), H-3->L+4 (4%), HOMO->L+8 (2%) | 8-->30 (22)   | 8-->67 (59)  | 71-->1 (-70)  | 13-->2 (-11) |
| 34 | 181.5926 | 0      | H-4->L+4 (54%), H-3->L+5 (29%)                 | H-6->LUMO (3%), H-1->L+5 (7%)                | 46-->23 (-23) | 14-->71 (57) | 37-->5 (-32)  | 2-->2 (0)    |
| 35 | 179.0127 | 0.0423 | H-5->L+3 (13%), H-4->L+5 (21%), H-3->L+4 (47%) | H-1->L+4 (9%), HOMO->L+8 (4%)                | 45-->23 (-22) | 12-->72 (60) | 40-->2 (-38)  | 4-->3 (-1)   |
| 36 | 178.2355 | 0      | H-4->L+4 (35%), H-3->L+5 (50%)                 | H-1->L+5 (5%), H-1->L+8 (3%)                 | 49-->29 (-20) | 13-->66 (53) | 35-->2 (-33)  | 2-->3 (1)    |
| 37 | 177.8061 | 0.0078 | HOMO->L+8 (87%)                                | H-4->L+5 (3%), H-3->L+4 (3%), HOMO->L+5 (3%) | 93-->49 (-44) | 3-->11 (8)   | 4-->-1 (-5)   | 0-->41 (41)  |
| 38 | 176.5729 | 0.0473 | H-2->L+4 (11%), H-1->L+7 (75%)                 | H-4->L+3 (8%)                                | 28-->66 (38)  | 10-->28 (18) | 60-->1 (-59)  | 1-->5 (4)    |
| 39 | 175.8591 | 0.0015 | H-6->L+1 (94%)                                 |                                              | 31-->44 (13)  | 10-->50 (40) | 46-->5 (-41)  | 12-->0 (-12) |
| 40 | 172.5238 | 0.0195 | H-6->L+2 (38%), H-4->L+5 (17%), H-3->L+4 (26%) | H-4->L+2 (8%), H-2->L+7 (4%)                 | 44-->29 (-15) | 13-->66 (53) | 37-->4 (-33)  | 6-->1 (-5)   |

**Table S7:** Energy and composition of TD-DFT calculated singlet-singlet transitions of *Ir(CO)<sub>2</sub>dbm*

| No. | Wavelength (nm) | Osc. Strength | Major contribs                                   | Minor contribs                                                            | Ir                            | CO            | chelate       | Ph            |
|-----|-----------------|---------------|--------------------------------------------------|---------------------------------------------------------------------------|-------------------------------|---------------|---------------|---------------|
| 1   | 382.5728        | 0.0002        | HOMO->LUMO (99%)                                 |                                                                           | 96-->1 (-95)                  | 2-->2 (0)     | 2-->57 (55)   | 0-->40 (40)   |
| 2   | 345.562         | 0.4098        | H-1->LUMO (97%)                                  |                                                                           | 9-->1 (-8)                    | 5-->2 (-3)    | 62-->57 (-5)  | 25-->40 (15)  |
| 3   | 324.8806        | 0.0489        | HOMO->L+1 (92%)                                  | HOMO->L+3 (5%)                                                            | 96-->35 (-61)                 | 2-->41 (39)   | 2-->9 (7)     | 0-->15 (15)   |
| 4   | 309.1027        | 0.004         | HOMO->L+2 (92%)                                  | H-3->LUMO (4%)                                                            | 93-->28 (-65)                 | 2-->61 (59)   | 2-->7 (5)     | 3-->3 (0)     |
| 5   | 302.2457        | 0.2356        | H-2->LUMO (96%)                                  |                                                                           | 35-->1 (-34)                  | 8-->2 (-6)    | 10-->57 (47)  | 47-->40 (-7)  |
| 6   | 298.9444        | 0.3152        | H-3->LUMO (92%)                                  | HOMO->L+2 (4%)                                                            | 32-->2 (-30)                  | 9-->5 (-4)    | 8-->55 (47)   | 52-->38 (-14) |
| 7   | 289.1153        | 0.0484        | H-4->LUMO (92%)                                  |                                                                           | 2-->1 (-1)                    | 0-->2 (2)     | 1-->57 (56)   | 97-->40 (-57) |
| 8   | 288.5366        | 0.0001        | H-5->LUMO (94%)                                  |                                                                           | 4-->1 (-3)                    | 1-->2 (1)     | 1-->57 (56)   | 93-->40 (-53) |
| 9   | 284.2761        | 0.1228        | H-1->L+1 (87%)                                   | H-6->LUMO (5%), H-3->L+1 (3%)                                             | 11-->35 (24)                  | 5-->40 (35)   | 58-->12 (-46) | 27-->13 (-14) |
| 10  | 275.7594        | 0             | H-3->L+2 (16%), H-1->L+2 (75%)                   | H-7->LUMO (3%), H-5->L+2 (2%)                                             | 13-->29 (16)                  | 6-->62 (56)   | 51-->7 (-44)  | 31-->3 (-28)  |
| 11  | 272.4568        | 0.0017        | H-7->LUMO (90%)                                  | H-2->L+1 (3%), H-1->L+2 (3%)                                              | 44-->3 (-41)                  | 16-->5 (-11)  | 36-->55 (19)  | 4-->38 (34)   |
| 12  | 268.1551        | 0.0003        | H-9->LUMO (93%)                                  |                                                                           | 0-->1 (1)                     | 7-->2 (-5)    | 75-->57 (-18) | 17-->40 (23)  |
| 13  | 267.6919        | 0.1416        | H-6->L+1 (10%), H-2->L+1 (74%)                   | H-8->LUMO (3%), H-7->LUMO (3%), H-7->L+2 (2%), H-2->L+3 (2%)              | 36-->34 (-2)                  | 8-->40 (32)   | 12-->12 (0)   | 44-->14 (-30) |
| 14  | 264.2121        | 0.0053        | HOMO->L+6 (85%)                                  |                                                                           | H-3->L+1 (3%), HOMO->L+3 (6%) | 94-->27 (-67) | 2-->65 (63)   | 2-->1 (-1)    |
| 15  | 258.5482        | 0.0039        | H-6->L+2 (16%), H-2->L+2 (65%)                   | H-6->LUMO (3%), H-3->L+6 (3%), H-1->L+6 (5%)                              | 34-->29 (-5)                  | 8-->63 (55)   | 12-->6 (-6)   | 46-->3 (-43)  |
| 16  | 255.838         | 0.0002        | H-6->LUMO (77%)                                  | H-2->L+2 (3%), H-1->L+1 (3%), H-1->L+3 (9%)                               | 35-->4 (-31)                  | 7-->6 (-1)    | 14-->50 (36)  | 44-->41 (-3)  |
| 17  | 249.646         | 0.038         | H-3->L+1 (35%), HOMO->L+3 (51%)                  | HOMO->L+1 (4%)                                                            | 70-->20 (-50)                 | 5-->24 (19)   | 4-->10 (6)    | 21-->46 (25)  |
| 18  | 248.2365        | 0.0391        | H-3->L+1 (42%), HOMO->L+3 (35%), HOMO->L+6 (10%) |                                                                           | 63-->24 (-39)                 | 5-->32 (27)   | 5-->9 (4)     | 26-->35 (9)   |
| 19  | 245.1783        | 0.0115        | H-1->L+3 (76%)                                   | H-6->LUMO (7%), H-3->L+1 (5%), H-1->L+5 (2%), H-1->L+6 (3%)               | 12-->9 (-3)                   | 5-->13 (8)    | 55-->13 (-42) | 28-->65 (37)  |
| 20  | 241.4775        | 0.0067        | H-7->L+1 (55%), H-1->L+6 (21%)                   | H-7->L+3 (3%), H-3->L+6 (6%), H-1->L+3 (5%)                               | 33-->32 (-1)                  | 13-->48 (35)  | 41-->7 (-34)  | 12-->14 (2)   |
| 21  | 240.7928        | 0.0045        | H-8->LUMO (65%), H-3->L+2 (11%)                  | H-8->L+2 (2%), H-4->L+1 (3%), H-2->L+1 (2%), H-1->L+2 (3%), H-1->L+4 (3%) | 33-->8 (-25)                  | 7-->16 (9)    | 28-->43 (15)  | 32-->33 (1)   |
| 22  | 239.1071        | 0.002         | H-8->LUMO (14%), H-3->L+2                        |                                                                           | H-8->L+2 (7%), H-5->L+2 (3%), | 31-->24 (-7)  | 7-->55 (48)   | 22-->13 (-9)  |

|    |          |        |                                                                |                                                                                          |               |              |               |               |
|----|----------|--------|----------------------------------------------------------------|------------------------------------------------------------------------------------------|---------------|--------------|---------------|---------------|
|    |          |        | (45%), H-1->L+2 (16%)                                          | HOMO->L+7 (6%)                                                                           |               |              |               |               |
| 23 | 237.0091 | 0.0008 | H-8->LUMO (10%), H-4->L+1 (41%), H-1->L+4 (32%)                | H-5->LUMO (2%), H-4->L+3 (4%)                                                            | 8-->18 (10)   | 3-->20 (17)  | 26-->13 (-13) | 63-->49 (-14) |
| 24 | 236.7602 | 0.0001 | H-5->L+1 (46%), H-1->L+5 (36%)                                 | H-5->L+3 (4%), H-4->LUMO (2%), H-3->L+3 (2%), H-1->L+6 (3%)                              | 7-->20 (13)   | 3-->24 (21)  | 26-->7 (-19)  | 64-->49 (-15) |
| 25 | 234.7341 | 0.0019 | H-7->L+1 (31%), H-1->L+6 (45%)                                 | H-3->L+6 (6%), H-2->L+2 (8%), H-1->L+5 (3%)                                              | 24-->30 (6)   | 9-->58 (49)  | 45-->4 (-41)  | 21-->8 (-13)  |
| 26 | 234.1843 | 0      | HOMO->L+7 (58%), HOMO->L+8 (18%)                               | H-3->L+2 (7%), H-2->L+6 (4%), HOMO->L+4 (3%), HOMO->L+9 (7%)                             | 89-->16 (-73) | 3-->60 (57)  | 3-->5 (2)     | 6-->19 (13)   |
| 27 | 233.2898 | 0.0052 | HOMO->L+7 (15%), HOMO->L+8 (61%)                               | H-1->L+4 (3%), HOMO->L+4 (5%), HOMO->L+9 (4%)                                            | 92-->27 (-65) | 2-->53 (51)  | 4-->4 (0)     | 1-->16 (15)   |
| 28 | 230.9346 | 0.0462 | H-4->L+1 (40%), H-1->L+4 (50%)                                 | H-2->L+1 (2%)                                                                            | 6-->17 (11)   | 3-->20 (17)  | 34-->5 (-29)  | 57-->59 (2)   |
| 29 | 229.4729 | 0.0019 | H-5->L+1 (43%), H-1->L+5 (46%)                                 | H-3->L+1 (2%)                                                                            | 7-->19 (12)   | 3-->21 (18)  | 32-->5 (-27)  | 58-->55 (-3)  |
| 30 | 228.7827 | 0.0009 | HOMO->L+5 (98%)                                                |                                                                                          | 96-->1 (-95)  | 2-->0 (-2)   | 2-->2 (0)     | 0-->97 (97)   |
| 31 | 228.7109 | 0.0037 | H-6->L+6 (14%), H-2->L+6 (56%)                                 | H-3->L+8 (3%), H-2->L+3 (8%), H-1->L+8 (5%), HOMO->L+7 (4%)                              | 37-->26 (-11) | 7-->63 (56)  | 12-->2 (-10)  | 44-->9 (-35)  |
| 32 | 228.3865 | 0.0006 | HOMO->L+4 (88%)                                                | HOMO->L+8 (6%)                                                                           | 96-->2 (-94)  | 2-->4 (2)    | 2-->1 (-1)    | 0-->93 (93)   |
| 33 | 225.348  | 0.0247 | H-7->L+2 (19%), H-6->L+1 (40%), H-2->L+1 (10%)                 | H-4->L+1 (5%), H-2->L+3 (9%), H-2->L+6 (4%), HOMO->L+8 (5%)                              | 40-->32 (-8)  | 9-->45 (36)  | 13-->8 (-5)   | 38-->15 (-23) |
| 34 | 221.5151 | 0.0119 | H-7->L+2 (45%), H-2->L+3 (15%)                                 | H-7->L+8 (2%), H-6->L+1 (7%), H-3->L+7 (5%), H-1->L+7 (9%), H-1->L+9 (2%)                | 37-->23 (-14) | 12-->52 (40) | 31-->7 (-24)  | 20-->19 (-1)  |
| 35 | 219.1463 | 0.0379 | H-6->L+1 (20%), H-4->L+3 (14%), H-2->L+3 (30%)                 | H-7->L+2 (3%), H-3->L+4 (6%), H-2->L+5 (6%), H-2->L+6 (3%), H-1->L+4 (4%), H-1->L+7 (2%) | 29-->14 (-15) | 7-->20 (13)  | 13-->8 (-5)   | 52-->58 (6)   |
| 36 | 217.7071 | 0.0348 | H-5->L+3 (28%), H-3->L+3 (18%), H-2->L+4 (17%)                 | H-5->L+1 (4%), H-5->L+5 (5%), H-3->L+5 (9%), H-1->L+5 (8%)                               | 18-->6 (-12)  | 5-->7 (2)    | 10-->6 (-4)   | 66-->81 (15)  |
| 37 | 216.5701 | 0.0102 | H-6->L+1 (12%), H-4->L+3 (30%), H-2->L+3 (26%), H-2->L+5 (13%) | H-4->L+1 (2%), H-3->L+4 (8%)                                                             | 23-->11 (-12) | 5-->12 (7)   | 6-->8 (2)     | 65-->69 (4)   |
| 38 | 215.2578 | 0.0081 | H-4->L+2 (78%)                                                 | H-6->L+2 (4%), H-5->L+3 (3%), H-3->L+6 (3%), H-2->L+2 (6%)                               | 6-->29 (23)   | 1-->62 (61)  | 2-->5 (3)     | 90-->4 (-86)  |
| 39 | 214.7805 | 0.049  | H-8->L+1 (12%), H-5->L+3 (13%), H-3->L+3 (46%)                 | H-4->L+2 (4%), H-3->L+1 (3%), H-3->L+5 (2%), H-3->L+6 (3%), H-2->L+4 (4%), H-1->L+6 (2%) | 25-->14 (-11) | 7-->21 (14)  | 11-->9 (-2)   | 57-->56 (-1)  |
| 40 | 214.5129 | 0.0009 | H-5->L+2 (85%)                                                 | H-3->L+2 (8%)                                                                            | 7-->30 (23)   | 2-->64 (62)  | 2-->5 (3)     | 90-->1 (-89)  |

**Table S8:** Energy and composition of TD-DFT calculated singlet-singlet transitions of *Ir(CO)<sub>2</sub>tfpb*

| No. | Wavelength (nm) | Osc. Strength | Major contribs                                    | Minor contribs                                               | Ir                           | CO           | chelate      | CF3          | Ph            |
|-----|-----------------|---------------|---------------------------------------------------|--------------------------------------------------------------|------------------------------|--------------|--------------|--------------|---------------|
| 1   | 399.6525        | 0.0002        | HOMO->LUMO (99%)                                  |                                                              | 96-->1 (-95)                 | 2-->2 (0)    | 2-->67 (65)  | 0-->3 (3)    | 0-->27 (27)   |
| 2   | 333.3356        | 0.1955        | H-1->LUMO (91%)                                   | H-2->LUMO (2%)                                               | 18-->1 (-17)                 | 7-->2 (-5)   | 56-->67 (11) | 0-->3 (3)    | 19-->27 (8)   |
| 3   | 323.1701        | 0.0513        | HOMO->L+1 (96%)                                   |                                                              | 96-->41 (-55)                | 2-->49 (47)  | 2-->8 (6)    | 0-->0 (0)    | 0-->2 (2)     |
| 4   | 313.5427        | 0.0259        | HOMO->L+2 (89%)                                   | H-2->LUMO (5%), H-1->LUMO (3%)                               | 90-->29 (-61)                | 3-->57 (54)  | 4-->10 (6)   | 0-->1 (1)    | 3-->3 (0)     |
| 5   | 307.2109        | 0.3237        | H-2->LUMO (89%)                                   | HOMO->L+2 (6%)                                               | 40-->3 (-37)                 | 9-->6 (-3)   | 10-->63 (53) | 0-->3 (3)    | 42-->25 (-17) |
| 6   | 297.7598        | 0.0547        | H-3->LUMO (95%)                                   |                                                              | 5-->1 (-4)                   | 1-->2 (1)    | 1-->67 (66)  | 0-->3 (3)    | 92-->27 (-65) |
| 7   | 279.9309        | 0.0822        | H-4->LUMO (62%), H-1->L+1 (26%)                   | H-5->LUMO (6%)                                               | 47-->12 (-35)                | 11-->15 (4)  | 24-->50 (26) | 1-->3 (2)    | 17-->20 (3)   |
| 8   | 277.2207        | 0.0168        | H-7->LUMO (12%), H-5->LUMO (77%)                  | H-4->LUMO (3%), H-1->L+1 (4%)                                | 40-->3 (-37)                 | 16-->4 (-12) | 38-->64 (26) | 1-->3 (2)    | 4-->26 (22)   |
| 9   | 271.5557        | 0.0005        | H-2->L+2 (10%), H-1->L+2 (76%)                    | H-6->L+2 (3%), H-4->L+2 (5%), H-3->L+2 (2%)                  | 22-->31 (9)                  | 7-->62 (55)  | 47-->5 (-42) | 0-->1 (1)    | 23-->1 (-22)  |
| 10  | 267.4436        | 0.1478        | H-4->LUMO (26%), H-1->L+1 (45%), HOMO->L+4 (18%)  | H-2->L+1 (2%)                                                | 45-->27 (-18)                | 8-->39 (31)  | 31-->23 (-8) | 0-->1 (1)    | 15-->9 (-6)   |
| 11  | 263.8972        | 0.0349        | H-7->LUMO (41%), H-2->L+1 (17%), HOMO->L+4 (18%)  | H-5->LUMO (6%), H-4->LUMO (3%), H-4->L+1 (5%), H-1->L+1 (6%) | 34-->18 (-16)                | 8-->28 (20)  | 40-->37 (-3) | 4-->2 (-2)   | 14-->15 (1)   |
| 12  | 263.5886        | 0.0311        | H-7->LUMO (43%), H-2->L+1 (13%), HOMO->L+4 (19%)  | H-5->LUMO (8%), H-4->L+1 (4%), H-1->L+1 (5%)                 | 33-->16 (-17)                | 8-->27 (19)  | 42-->39 (-3) | 5-->2 (-3)   | 12-->16 (4)   |
| 13  | 260.3452        | 0.0561        | H-2->L+1 (34%), HOMO->L+4 (38%)                   | H-6->LUMO (5%), H-4->L+1 (9%), H-1->L+1 (7%)                 | 62-->33 (-29)                | 6-->54 (48)  | 11-->8 (-3)  | 0-->1 (1)    | 20-->4 (-16)  |
| 14  | 257.4583        | 0.0048        | H-4->L+2 (24%), H-2->L+2 (56%)                    | H-6->L+2 (2%), H-3->L+2 (3%), H-1->L+2 (4%), H-1->L+4 (4%)   | 39-->31 (-8)                 | 9-->62 (53)  | 14-->5 (-9)  | 0-->1 (1)    | 37-->1 (-36)  |
| 15  | 242.8111        | 0.0201        | H-6->LUMO (79%)                                   |                                                              | H-2->L+1 (8%), H-1->L+5 (2%) | 37-->5 (-32) | 7-->6 (-1)   | 34-->60 (26) | 0-->3 (3)     |
| 16  | 237.463         | 0.0011        | H-5->L+1 (51%), H-1->L+4 (25%)                    | H-4->L+1 (3%), H-4->L+4 (2%), H-2->L+4 (4%)                  | 39-->36 (-3)                 | 14-->56 (42) | 37-->5 (-32) | 0-->0 (0)    | 10-->3 (-7)   |
| 17  | 234.7163        | 0.0089        | H-4->L+1 (47%), H-2->L+1 (14%), HOMO->L+7 (16%)   | H-5->L+2 (4%), H-1->L+1 (4%), H-1->L+4 (3%)                  | 58-->39 (-19)                | 10-->53 (43) | 13-->7 (-6)  | 0-->0 (0)    | 18-->2 (-16)  |
| 18  | 234.1135        | 0.0002        | HOMO->L+3 (11%), HOMO->L+5 (19%), HOMO->L+6 (53%) | H-5->L+1 (4%), HOMO->L+7 (6%)                                | 94-->13 (-81)                | 3-->55 (52)  | 3-->7 (4)    | 0-->1 (1)    | 0-->24 (24)   |
| 19  | 232.0845        | 0.002         | H-4->L+1 (14%), HOMO->L+6 (18%), HOMO->L+7 (51%)  | HOMO->L+3 (8%)                                               | 90-->27 (-63)                | 4-->59 (55)  | 3-->4 (1)    | 0-->0 (0)    | 3-->9 (6)     |
| 20  | 231.3052        | 0.0035        | H-3->L+1 (69%), H-1->L+4                          | H-5->L+1 (5%), H-2->L+1 (2%), H-2-                           | 11-->39 (28)                 | 3-->51 (48)  | 10-->7 (-3)  | 0-->0 (0)    | 76-->2 (-74)  |

|    |          |        |                                                                   |                                                                                                                                                      |               |              |               |            |               |
|----|----------|--------|-------------------------------------------------------------------|------------------------------------------------------------------------------------------------------------------------------------------------------|---------------|--------------|---------------|------------|---------------|
|    |          |        | (10%)                                                             | >L+2 (3%)                                                                                                                                            |               |              |               |            |               |
| 21 | 230.6897 | 0.0011 | H-5->L+1 (17%), H-3->L+1 (16%), H-1->L+4 (13%), HOMO->L+3 (26%)   | H-4->L+2 (4%), H-2->L+2 (6%), H-1->L+2 (3%), H-1->L+3 (2%), HOMO->L+5 (3%), HOMO->L+7 (3%)                                                           | 50-->24 (-26) | 7-->38 (31)  | 19-->6 (-13)  | 0-->1 (1)  | 24-->31 (7)   |
| 22 | 230.2485 | 0.0003 | H-5->L+1 (10%), HOMO->L+3 (42%), HOMO->L+6 (10%), HOMO->L+7 (16%) | H-3->L+1 (3%), H-2->L+2 (2%), H-1->L+4 (7%)                                                                                                          | 80-->17 (-63) | 5-->35 (30)  | 9-->5 (-4)    | 0-->1 (1)  | 6-->43 (37)   |
| 23 | 226.9277 | 0.0015 | H-4->L+2 (22%), H-4->L+4 (17%), H-2->L+4 (24%), H-1->L+4 (11%)    | H-6->L+2 (3%), H-2->L+2 (3%), H-1->L+2 (6%), H-1->L+7 (2%)                                                                                           | 42-->29 (-13) | 10-->65 (55) | 21-->3 (-18)  | 0-->0 (0)  | 26-->3 (-23)  |
| 24 | 223.8426 | 0.0027 | H-4->L+2 (28%), H-2->L+4 (25%)                                    | H-6->L+2 (4%), H-5->L+1 (4%), H-4->L+4 (7%), H-1->L+2 (4%), H-1->L+7 (3%), HOMO->L+3 (3%), HOMO->L+5 (9%)                                            | 53-->26 (-27) | 9-->56 (47)  | 15-->6 (-9)   | 0-->1 (1)  | 23-->12 (-11) |
| 25 | 222.6848 | 0.0222 | H-1->L+3 (71%)                                                    | H-3->L+1 (4%), H-3->L+5 (7%), H-2->L+3 (2%), H-1->L+4 (3%), H-1->L+5 (2%)                                                                            | 16-->4 (-12)  | 6-->7 (1)    | 48-->7 (-41)  | 0-->1 (1)  | 28-->81 (53)  |
| 26 | 221.8837 | 0.0002 | HOMO->L+5 (63%), HOMO->L+6 (14%)                                  | H-4->L+2 (4%), H-2->L+4 (3%), HOMO->L+3 (6%), HOMO->L+4 (3%)                                                                                         | 93-->7 (-86)  | 3-->24 (21)  | 2-->16 (14)   | 0-->3 (3)  | 2-->51 (49)   |
| 27 | 220.2128 | 0.008  | H-5->L+2 (67%)                                                    | H-5->L+7 (4%), H-4->L+1 (3%), H-3->L+2 (3%), H-2->L+6 (3%), H-1->L+6 (9%)                                                                            | 43-->29 (-14) | 16-->64 (48) | 33-->5 (-28)  | 0-->1 (1)  | 9-->1 (-8)    |
| 28 | 216.6268 | 0.0046 | H-3->L+2 (82%)                                                    | H-2->L+2 (9%)                                                                                                                                        | 8-->31 (23)   | 2-->62 (60)  | 2-->5 (3)     | 0-->1 (1)  | 88-->1 (-87)  |
| 29 | 214.3127 | 0.0261 | H-2->L+3 (37%), H-1->L+3 (12%), H-1->L+5 (27%)                    | H-3->L+2 (2%), H-3->L+5 (9%)                                                                                                                         | 24-->2 (-22)  | 7-->6 (-1)   | 30-->12 (-18) | 0-->2 (2)  | 38-->78 (40)  |
| 30 | 210.3745 | 0.0394 | H-6->L+1 (67%), H-1->L+5 (10%)                                    | H-3->L+5 (3%), H-2->L+1 (2%), H-2->L+3 (7%)                                                                                                          | 34-->33 (-1)  | 7-->39 (32)  | 34-->10 (-24) | 0-->1 (1)  | 25-->18 (-7)  |
| 31 | 207.6335 | 0.0012 | H-1->L+7 (44%)                                                    | H-7->L+1 (4%), H-6->L+1 (5%), H-6->L+7 (2%), H-4->L+7 (3%), H-3->L+5 (2%), H-2->L+3 (5%), H-2->L+4 (5%), H-2->L+7 (8%), H-1->L+4 (3%), H-1->L+5 (6%) | 23-->28 (5)   | 8-->54 (46)  | 43-->5 (-38)  | 1-->1 (0)  | 25-->12 (-13) |
| 32 | 206.9611 | 0.0026 | H-6->L+1 (13%), H-2->L+3 (11%), H-1->L+5 (36%), H-1->L+7 (10%)    | H-3->L+5 (6%), H-2->L+4 (3%), H-2->L+7 (2%), H-1->L+6 (2%)                                                                                           | 23-->14 (-9)  | 7-->25 (18)  | 40-->14 (-26) | 0-->2 (2)  | 29-->46 (17)  |
| 33 | 206.1045 | 0      | H-7->L+1 (91%)                                                    | H-1->L+7 (3%)                                                                                                                                        | 3-->41 (38)   | 7-->49 (42)  | 73-->8 (-65)  | 9-->0 (-9) | 8-->2 (-6)    |
| 34 | 203.503  | 0.0003 | H-9->LUMO (16%), H-8->LUMO (72%)                                  |                                                                                                                                                      | 14-->1 (-13)  | 5-->2 (-3)   | 25-->67 (42)  | 5-->3 (-2) | 51-->27 (-24) |
| 35 | 202.8604 | 0.0014 | H-6->L+2 (60%), H-4->L+4 (10%)                                    | H-4->L+2 (3%), H-3->L+2 (3%), H-2->L+2 (6%), H-1->L+4 (3%), H-1->L+7                                                                                 | 38-->31 (-7)  | 7-->63 (56)  | 30-->5 (-25)  | 0-->1 (1)  | 24-->1 (-23)  |

|    |          |        |                                                 |                                                                                                         |               |              |              |           |               |
|----|----------|--------|-------------------------------------------------|---------------------------------------------------------------------------------------------------------|---------------|--------------|--------------|-----------|---------------|
|    |          |        |                                                 | (3%)                                                                                                    |               |              |              |           |               |
| 36 | 201.0935 | 0.0008 | H-3->L+3 (20%), H-2->L+5 (55%)                  | H-5->L+4 (2%), H-4->L+7 (2%), H-3->L+5 (5%), H-2->L+3 (3%), H-2->L+7 (3%)                               | 28-->4 (-24)  | 7-->11 (4)   | 8-->16 (8)   | 0-->2 (2) | 56-->66 (10)  |
| 37 | 199.8037 | 0.0002 | H-6->L+2 (15%), H-4->L+7 (15%), H-2->L+7 (30%)  | H-6->L+4 (2%), H-4->L+2 (3%), H-4->L+4 (8%), H-2->L+4 (3%), H-1->L+4 (2%), H-1->L+6 (3%), H-1->L+7 (5%) | 42-->31 (-11) | 9-->64 (55)  | 20-->3 (-17) | 0-->0 (0) | 29-->1 (-28)  |
| 38 | 198.1845 | 0.0014 | H-9->LUMO (14%), H-4->L+4 (32%), H-2->L+7 (14%) | H-8->LUMO (5%), H-6->L+2 (4%), H-6->L+4 (4%), H-4->L+7 (5%), H-2->L+4 (4%), H-1->L+4 (7%)               | 39-->23 (-16) | 9-->52 (43)  | 18-->16 (-2) | 1-->1 (0) | 34-->8 (-26)  |
| 39 | 197.9882 | 0.0029 | H-9->LUMO (64%), H-8->LUMO (13%)                | H-4->L+4 (7%), H-2->L+7 (5%)                                                                            | 13-->5 (-8)   | 4-->10 (6)   | 18-->59 (41) | 3-->3 (0) | 62-->24 (-38) |
| 40 | 197.0067 | 0.1002 | H-5->L+4 (13%), H-1->L+6 (49%)                  | H-5->L+2 (2%), H-5->L+7 (8%), H-4->L+6 (5%), H-3->L+3 (6%), H-1->L+7 (3%)                               | 27-->19 (-8)  | 10-->71 (61) | 44-->3 (-41) | 0-->0 (0) | 19-->8 (-11)  |

**Table S9:** Energy and composition of TD-DFT calculated singlet-singlet transitions of *Ir(CO)<sub>2</sub>tfaa*

| No. | Wavelength (nm) | Osc. Strength | Major contribs                                   | Minor contribs                                               | Ir            | CO           | chelate      | CF <sub>3</sub> | CH <sub>3</sub> |
|-----|-----------------|---------------|--------------------------------------------------|--------------------------------------------------------------|---------------|--------------|--------------|-----------------|-----------------|
| 1   | 369.815         | 0             | HOMO->LUMO (100%)                                |                                                              | 96-->1 (-95)  | 3-->3 (0)    | 2-->86 (84)  | 0-->6 (6)       | 0-->5 (5)       |
| 2   | 322.7746        | 0.0535        | HOMO->L+1 (97%)                                  |                                                              | 96-->43 (-53) | 3-->51 (48)  | 2-->6 (4)    | 0-->0 (0)       | 0-->0 (0)       |
| 3   | 314.6727        | 0.0144        | HOMO->L+2 (91%)                                  | H-1->LUMO (5%)                                               | 92-->30 (-62) | 3-->59 (56)  | 5-->10 (5)   | 0-->1 (1)       | 0-->1 (1)       |
| 4   | 302.312         | 0.0225        | H-1->LUMO (86%)                                  | H-3->LUMO (6%), HOMO->L+2 (6%)                               | 33-->3 (-30)  | 10-->6 (-4)  | 56-->81 (25) | 0-->5 (5)       | 1-->4 (3)       |
| 5   | 275.1475        | 0.0267        | H-2->LUMO (78%), H-1->L+1 (18%)                  | HOMO->L+3 (2%)                                               | 67-->10 (-57) | 14-->13 (-1) | 17-->69 (52) | 0-->5 (5)       | 1-->4 (3)       |
| 6   | 270.4008        | 0.0001        | H-1->L+2 (90%)                                   | H-3->L+2 (8%)                                                | 29-->32 (3)   | 11-->62 (51) | 59-->5 (-54) | 0-->1 (1)       | 1-->1 (0)       |
| 7   | 266.1405        | 0.183         | H-2->LUMO (17%), H-1->L+1 (38%), HOMO->L+3 (38%) |                                                              | 64-->30 (-34) | 8-->50 (42)  | 27-->18 (-9) | 0-->1 (1)       | 0-->1 (1)       |
| 8   | 263.6615        | 0.0008        | H-5->LUMO (24%), H-4->LUMO (74%)                 |                                                              | 36-->1 (-35)  | 15-->3 (-12) | 44-->86 (42) | 2-->6 (4)       | 3-->5 (2)       |
| 9   | 261.0194        | 0.0383        | H-2->L+1 (13%), H-1->L+1 (28%), HOMO->L+3 (52%)  | H-3->LUMO (2%)                                               | 72-->35 (-37) | 7-->60 (53)  | 21-->5 (-16) | 0-->0 (0)       | 0-->0 (0)       |
| 10  | 257.7741        | 0.0488        | H-2->L+1 (70%)                                   | H-4->L+2 (3%), H-3->LUMO (7%), H-1->L+1 (9%), HOMO->L+3 (6%) | 70-->39 (-31) | 14-->49 (35) | 16-->11 (-5) | 0-->1 (1)       | 1-->1 (0)       |
| 11  | 254.4153        | 0.0018        | H-5->LUMO (21%), H-2->L+2 (61%)                  | H-4->LUMO (7%), H-1->L+3 (7%)                                | 55-->23 (-32) | 13-->45 (32) | 28-->28 (0)  | 2-->2 (0)       | 2-->2 (0)       |
| 12  | 254.2223        | 0.005         | H-5->LUMO (55%), H-4->LUMO (16%), H-2->L+2 (25%) |                                                              | 30-->9 (-21)  | 11-->18 (7)  | 49-->65 (16) | 5-->4 (-1)      | 4-->4 (0)       |
| 13  | 236.5298        | 0.2036        | H-3->LUMO (76%)                                  | H-4->L+2 (2%), H-2->L+1 (4%), H-1->LUMO (6%), HOMO->L+5 (7%) | 54-->6 (-48)  | 9-->11 (2)   | 35-->75 (40) | 1-->5 (4)       | 1-->4 (3)       |
| 14  | 236.354         | 0.0003        | H-4->L+1 (63%), H-1->L+3 (28%)                   | H-3->L+3 (3%)                                                | 40-->39 (-1)  | 15-->57 (42) | 43-->4 (-39) | 0-->0 (0)       | 2-->0 (-2)      |
| 15  | 232.3324        | 0             | HOMO->L+4 (96%)                                  |                                                              | 96-->14 (-82) | 3-->85 (82)  | 2-->1 (-1)   | 0-->0 (0)       | 0-->0 (0)       |
| 16  | 231.7202        | 0.0147        | HOMO->L+5 (87%)                                  | H-3->LUMO (5%), H-2->L+1 (2%)                                | 93-->31 (-62) | 3-->59 (56)  | 4-->8 (4)    | 0-->1 (1)       | 0-->1 (1)       |
| 17  | 228.0043        | 0.0029        | H-4->L+1 (31%), H-1->L+3 (54%)                   | H-3->L+3 (2%), H-2->L+2 (9%)                                 | 39-->34 (-5)  | 13-->63 (50) | 47-->3 (-44) | 0-->0 (0)       | 1-->0 (-1)      |
| 18  | 223.3225        | 0.0001        | H-2->L+3 (82%), H-1->L+5 (10%)                   | H-3->L+5 (3%)                                                | 70-->29 (-41) | 14-->69 (55) | 14-->1 (-13) | 0-->0 (0)       | 1-->1 (0)       |
| 19  | 220.5418        | 0.0076        | H-3->L+1 (81%)                                   | H-4->L+2 (6%), H-4->L+3 (3%), H-2->L+4 (2%), H-1->L+1 (2%)   | 51-->41 (-10) | 10-->53 (43) | 37-->5 (-32) | 1-->0 (-1)      | 1-->0 (-1)      |
| 20  | 219.8301        | 0.0093        | H-4->L+2 (66%), H-1->L+4 (12%)                   | H-4->L+5 (4%), H-3->L+1 (8%), H-3->L+4 (3%)                  | 44-->30 (-14) | 16-->65 (49) | 38-->5 (-33) | 0-->0 (0)       | 2-->0 (-2)      |
| 21  | 216.7745        | 0.0001        | H-3->L+2 (88%)                                   | H-1->L+2 (7%)                                                | 49-->32 (-17) | 10-->62 (52) | 39-->5 (-34) | 1-->1 (0)       | 1-->1 (0)       |
| 22  | 206.9888        | 0             | H-5->L+1 (91%)                                   | H-1->L+5 (5%)                                                | 5-->43 (38)   | 8-->52 (44)  | 72-->5 (-67) | 9-->0 (-9)      | 6-->0 (-6)      |



|    |          |        |                                                |                                                              |               |              |              |              |             |
|----|----------|--------|------------------------------------------------|--------------------------------------------------------------|---------------|--------------|--------------|--------------|-------------|
| 23 | 205.6873 | 0      | H-2->L+3 (12%), H-1->L+5 (71%)                 | H-5->L+1 (6%), H-3->L+5 (7%)                                 | 34-->33 (-1)  | 11-->63 (52) | 53-->3 (-50) | 1-->0 (-1)   | 1-->1 (0)   |
| 24 | 197.2135 | 0.0007 | H-2->L+5 (92%)                                 | H-3->L+3 (2%)                                                | 75-->33 (-42) | 15-->63 (48) | 8-->3 (-5)   | 0-->0 (0)    | 1-->1 (0)   |
| 25 | 196.585  | 0.0002 | H-6->LUMO (95%)                                |                                                              | 26-->1 (-25)  | 9-->3 (-6)   | 49-->86 (37) | 10-->6 (-4)  | 6-->5 (-1)  |
| 26 | 195.7099 | 0.0783 | H-4->L+5 (17%), H-1->L+4 (63%)                 | H-5->L+2 (6%), H-4->L+2 (6%)                                 | 31-->20 (-11) | 12-->78 (66) | 55-->2 (-53) | 1-->0 (-1)   | 1-->0 (-1)  |
| 27 | 194.3113 | 0.1213 | H-5->L+2 (53%), H-4->L+3 (19%), H-2->L+4 (17%) | HOMO->L+6 (3%)                                               | 29-->29 (0)   | 11-->66 (55) | 50-->4 (-46) | 5-->0 (-5)   | 4-->1 (-3)  |
| 28 | 192.543  | 0.0229 | H-5->L+2 (34%), H-4->L+3 (25%), H-2->L+4 (31%) | H-4->L+5 (3%), H-1->L+4 (3%)                                 | 40-->25 (-15) | 13-->72 (59) | 40-->3 (-37) | 3-->0 (-3)   | 3-->0 (-3)  |
| 29 | 191.6649 | 0.0006 | H-3->L+3 (86%)                                 | H-2->L+5 (2%), H-1->L+3 (7%), H-1->L+6 (2%)                  | 49-->30 (-19) | 10-->68 (58) | 39-->1 (-38) | 1-->0 (-1)   | 1-->1 (0)   |
| 30 | 185.6329 | 0.0676 | HOMO->L+6 (92%)                                |                                                              | 96-->65 (-31) | 3-->7 (4)    | 2-->7 (5)    | 0-->-1 (-1)  | 0-->23 (23) |
| 31 | 181.3642 | 0.0991 | HOMO->L+7 (98%)                                |                                                              | 96-->73 (-23) | 3-->17 (14)  | 2-->6 (4)    | 0-->1 (1)    | 0-->4 (4)   |
| 32 | 178.0154 | 0.0001 | H-4->L+4 (81%)                                 | H-5->L+4 (2%), H-3->L+5 (6%), H-1->L+5 (3%), H-1->L+6 (3%)   | 44-->17 (-27) | 16-->80 (64) | 37-->2 (-35) | 0-->0 (0)    | 2-->1 (-1)  |
| 33 | 176.2842 | 0.0066 | H-1->L+6 (90%)                                 | H-4->L+4 (4%), H-3->L+3 (2%)                                 | 29-->62 (33)  | 11-->12 (1)  | 59-->7 (-52) | 0-->-1 (-1)  | 1-->21 (20) |
| 34 | 176.2266 | 0.013  | H-5->L+3 (53%), H-4->L+5 (11%), H-3->L+4 (10%) | H-6->L+2 (3%), H-4->L+3 (9%), H-2->L+4 (3%), H-1->L+4 (4%)   | 22-->27 (5)   | 10-->71 (61) | 57-->1 (-56) | 6-->0 (-6)   | 5-->1 (-4)  |
| 35 | 173.4409 | 0.0643 | H-5->L+3 (28%), H-4->L+5 (17%), H-3->L+4 (34%) | H-6->L+2 (3%), H-1->L+4 (9%)                                 | 33-->23 (-10) | 11-->75 (64) | 50-->2 (-48) | 3-->0 (-3)   | 3-->0 (-3)  |
| 36 | 173.2736 | 0.0152 | HOMO->L+8 (93%)                                |                                                              | 92-->15 (-77) | 3-->3 (0)    | 4-->68 (64)  | 0-->8 (8)    | 0-->6 (6)   |
| 37 | 172.998  | 0.0015 | H-3->L+5 (75%)                                 | H-4->L+4 (7%), H-1->L+5 (8%), H-1->L+6 (2%), HOMO->L+8 (3%)  | 50-->31 (-19) | 10-->61 (51) | 39-->6 (-33) | 1-->1 (0)    | 1-->2 (1)   |
| 38 | 171.7923 | 0.034  | HOMO->L+9 (70%)                                |                                                              | 83-->67 (-16) | 5-->15 (10)  | 11-->0 (-11) | 0-->0 (0)    | 0-->19 (19) |
| 39 | 170.9207 | 0.0005 | H-6->L+1 (92%)                                 |                                                              | 29-->42 (13)  | 8-->49 (41)  | 47-->8 (-39) | 10-->0 (-10) | 6-->0 (-6)  |
| 40 | 170.8571 | 0.103  | H-1->L+7 (42%), HOMO->L+9 (22%)                | H-5->L+3 (6%), H-4->L+3 (6%), H-2->L+4 (9%), HOMO->L+10 (3%) | 51-->60 (9)   | 9-->27 (18)  | 38-->4 (-34) | 1-->0 (-1)   | 1-->9 (8)   |

## NMR spectra

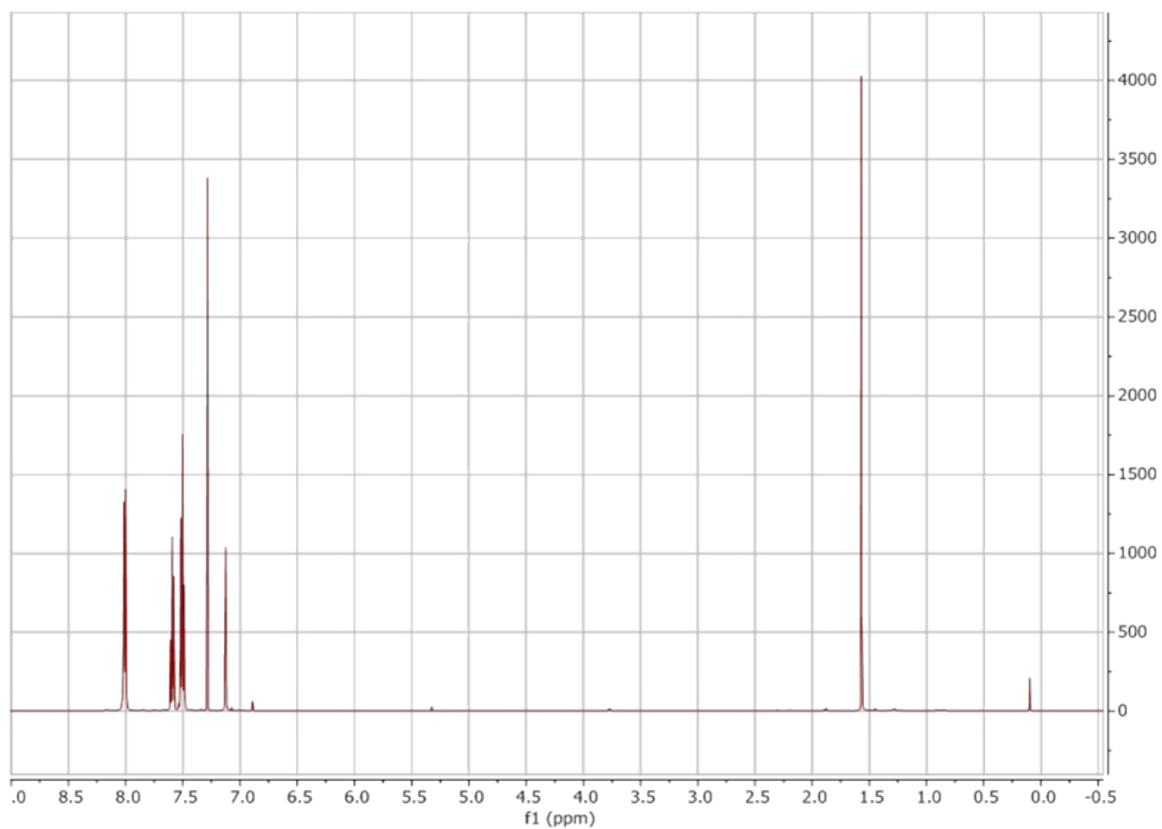

Figure S8: <sup>1</sup>H NMR spectrum for Ir(CO)<sub>2</sub>dbm

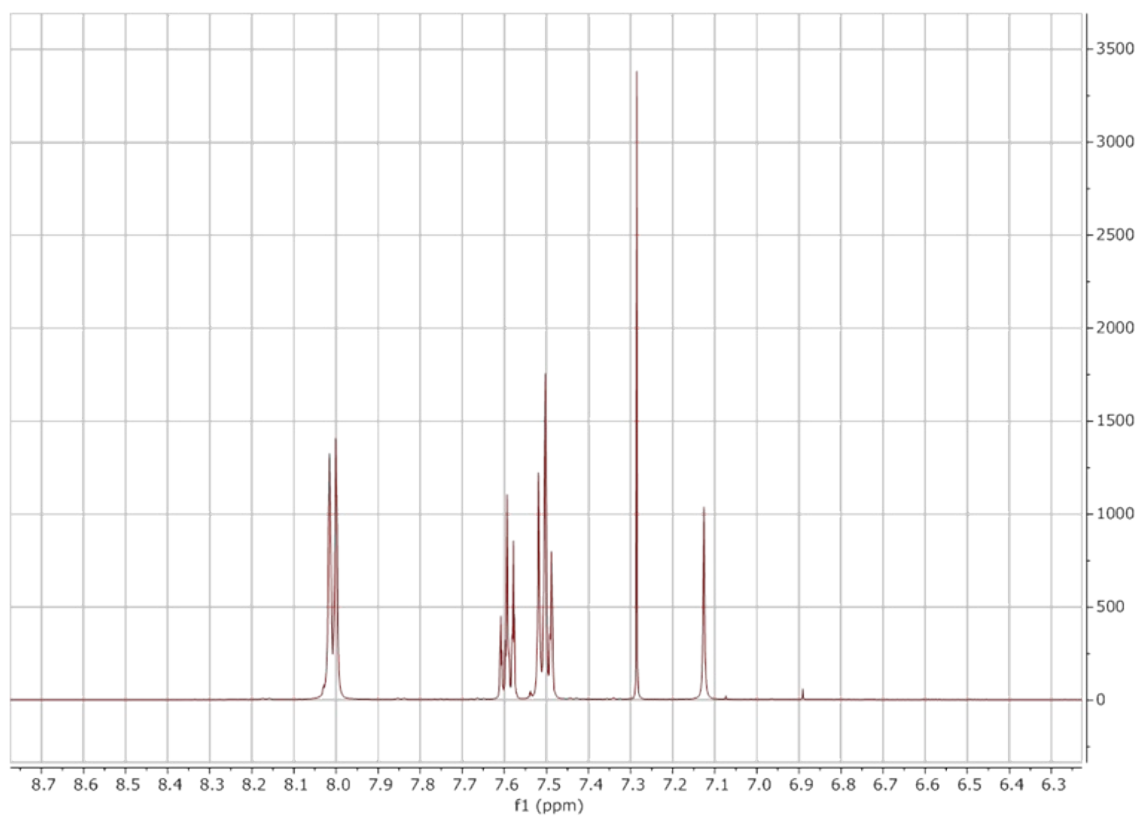

Figure S9: Aromatic region of the <sup>1</sup>H NMR spectrum for Ir(CO)<sub>2</sub>dbm

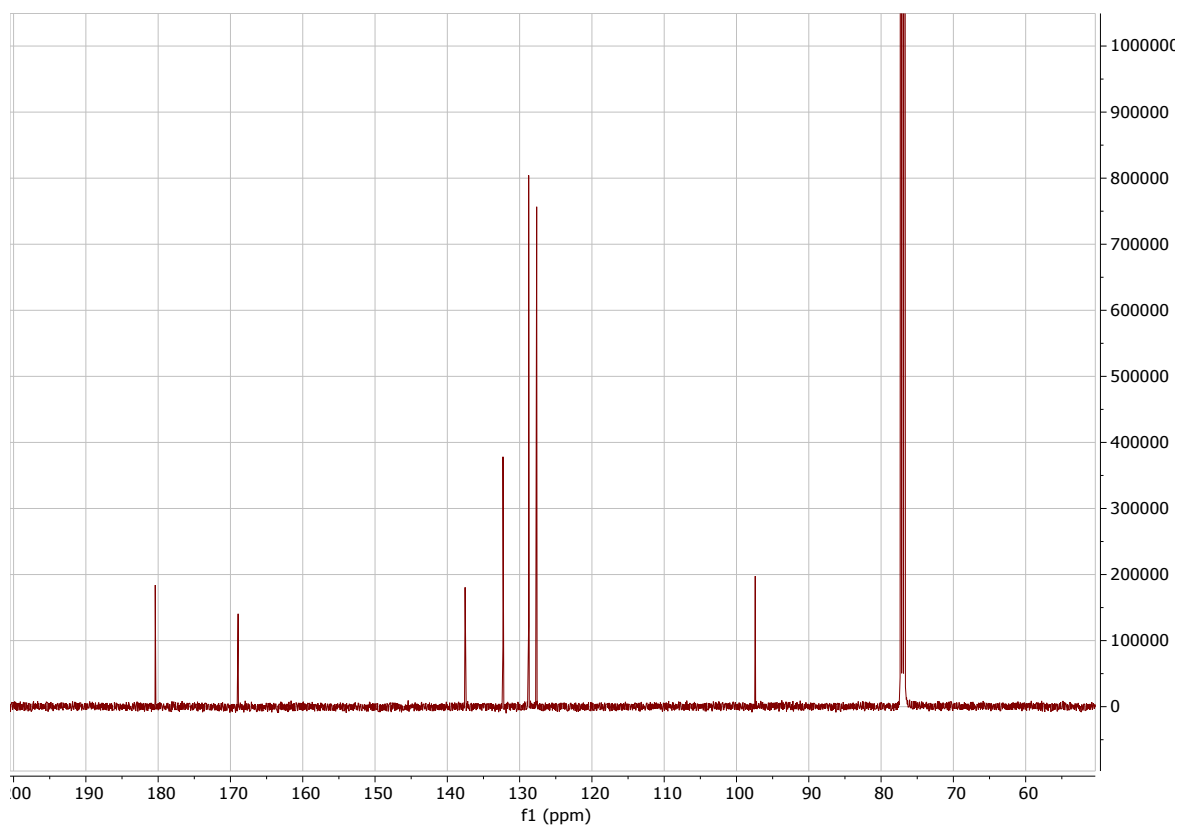

Figure S10:  $^{13}\text{C}$  NMR spectrum for  $\text{Ir}(\text{CO})_2\text{dbm}$

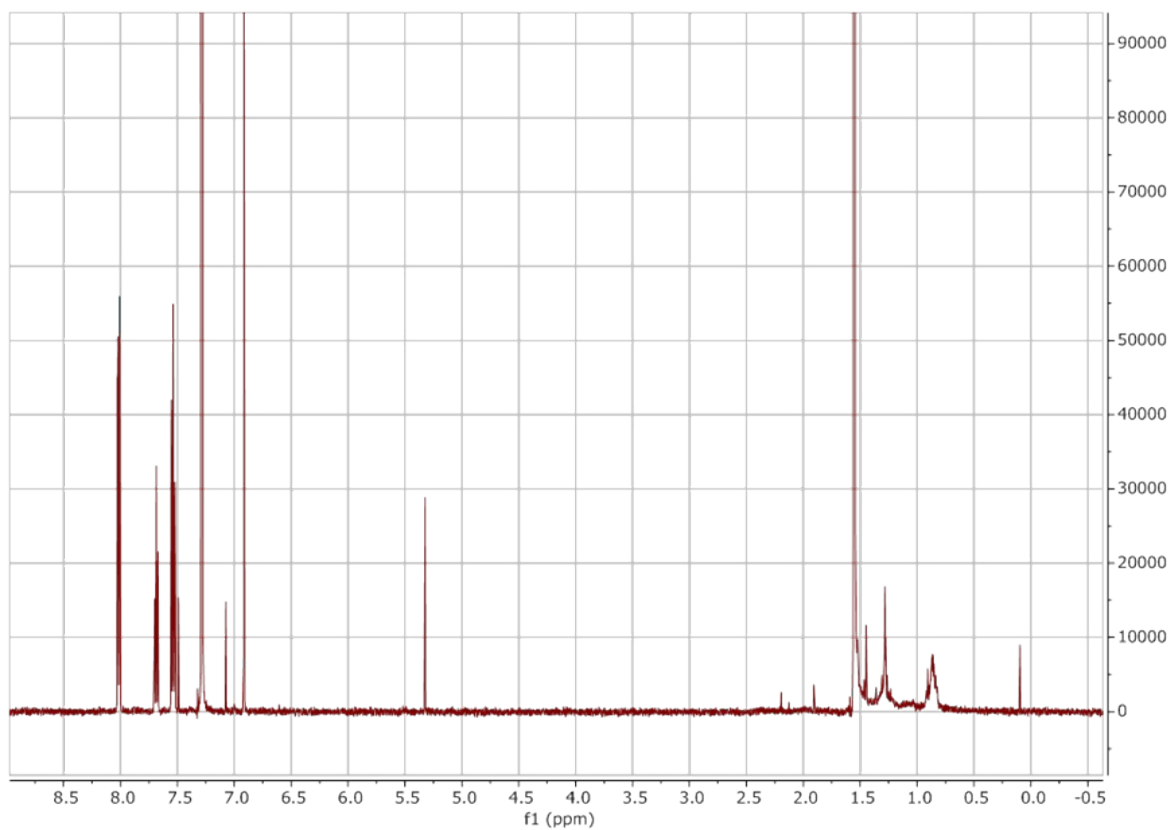

Figure S11:  $^1\text{H}$  NMR spectrum for  $\text{Ir}(\text{CO})_2\text{tfpb}$

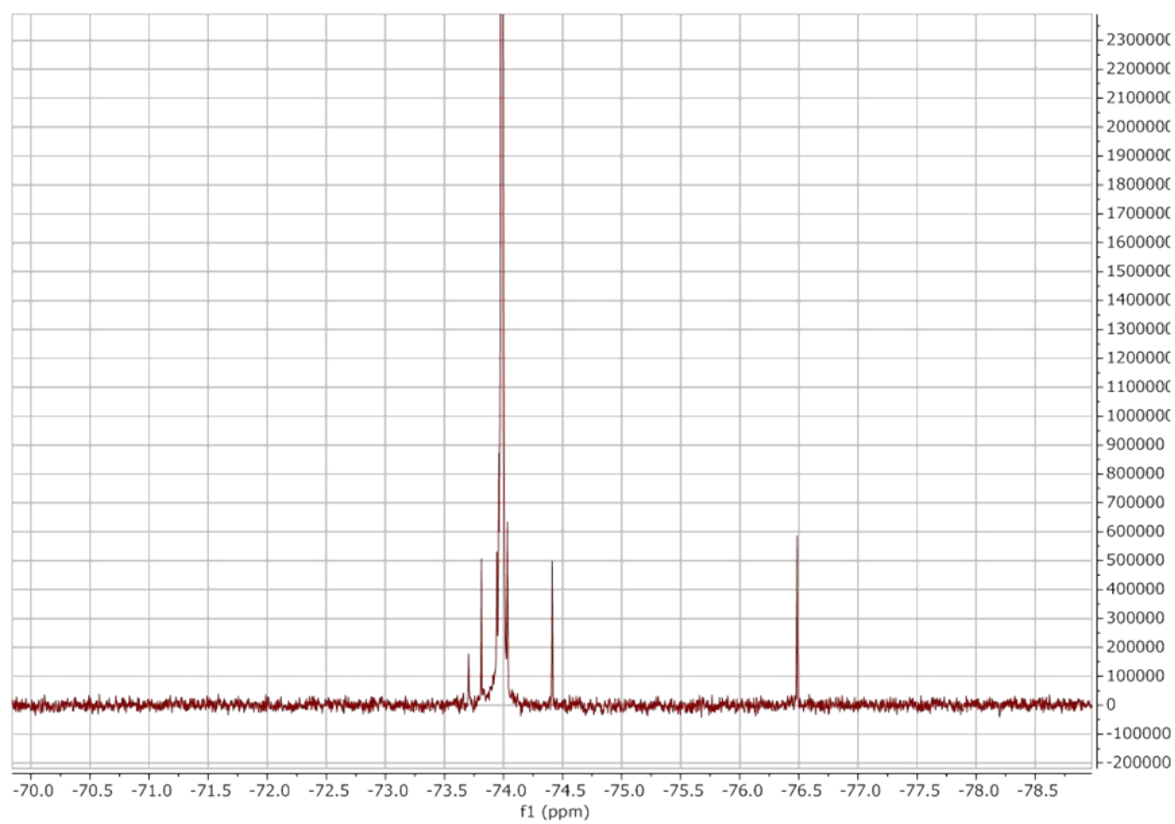

Figure S12:  $^{19}\text{F}$  NMR spectrum for  $\text{Ir}(\text{CO})_2\text{tfpb}$

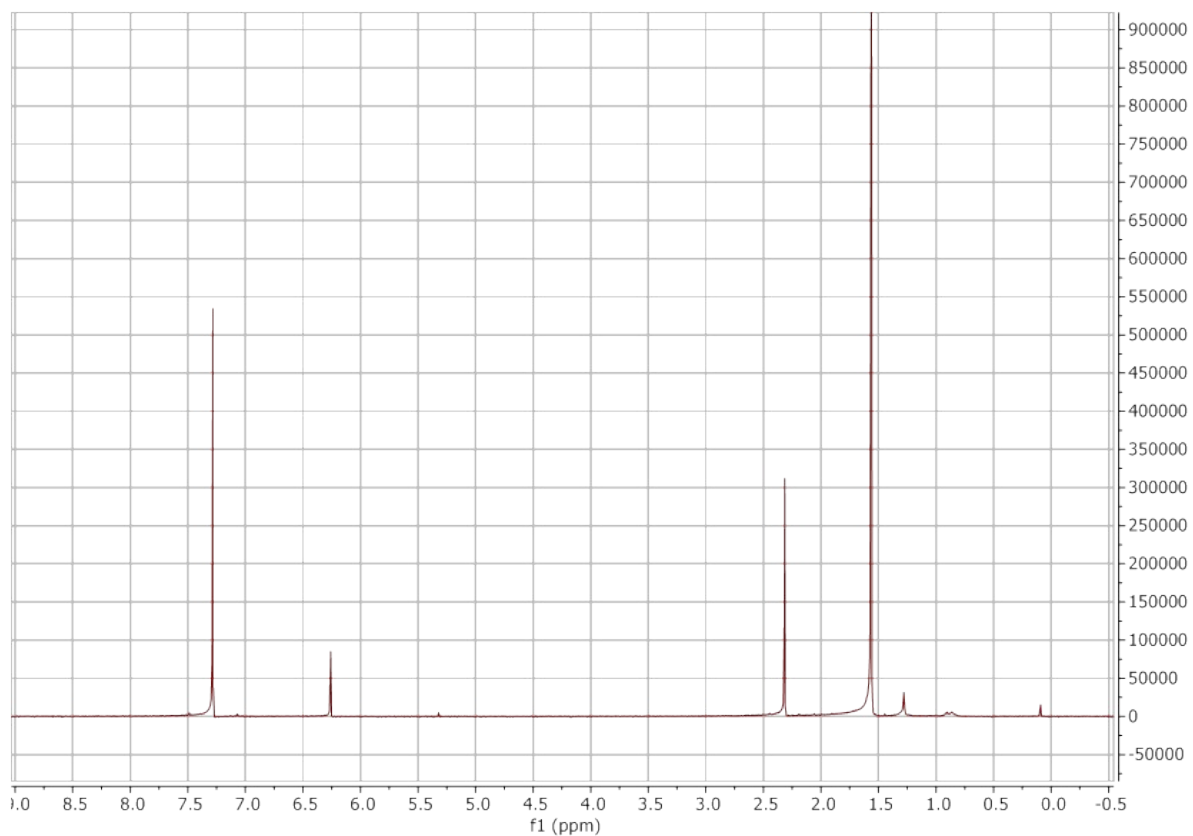

Figure S13:  $^1\text{H}$  NMR spectrum for  $\text{Ir}(\text{CO})_2\text{tfaa}$

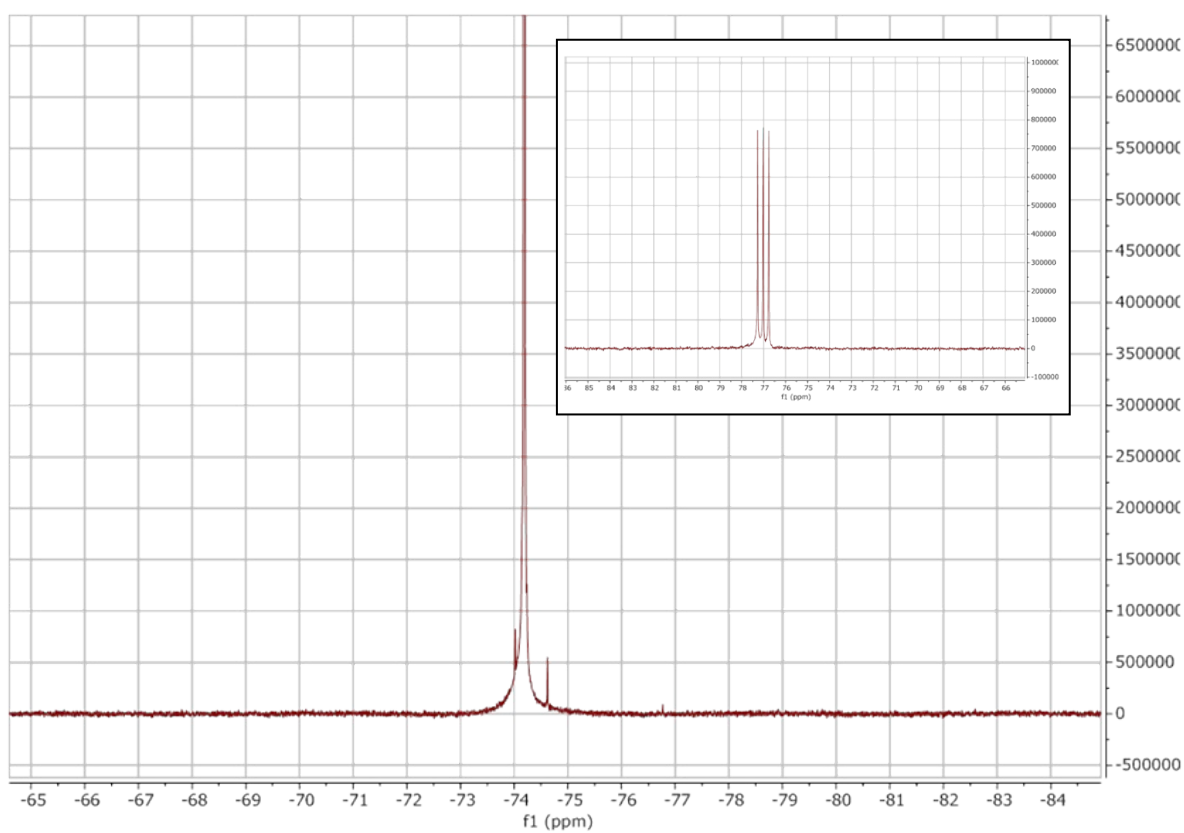

Figure S14:  $^{19}\text{F}$  NMR spectrum for  $\text{Ir}(\text{CO})_2\text{tfaa}$

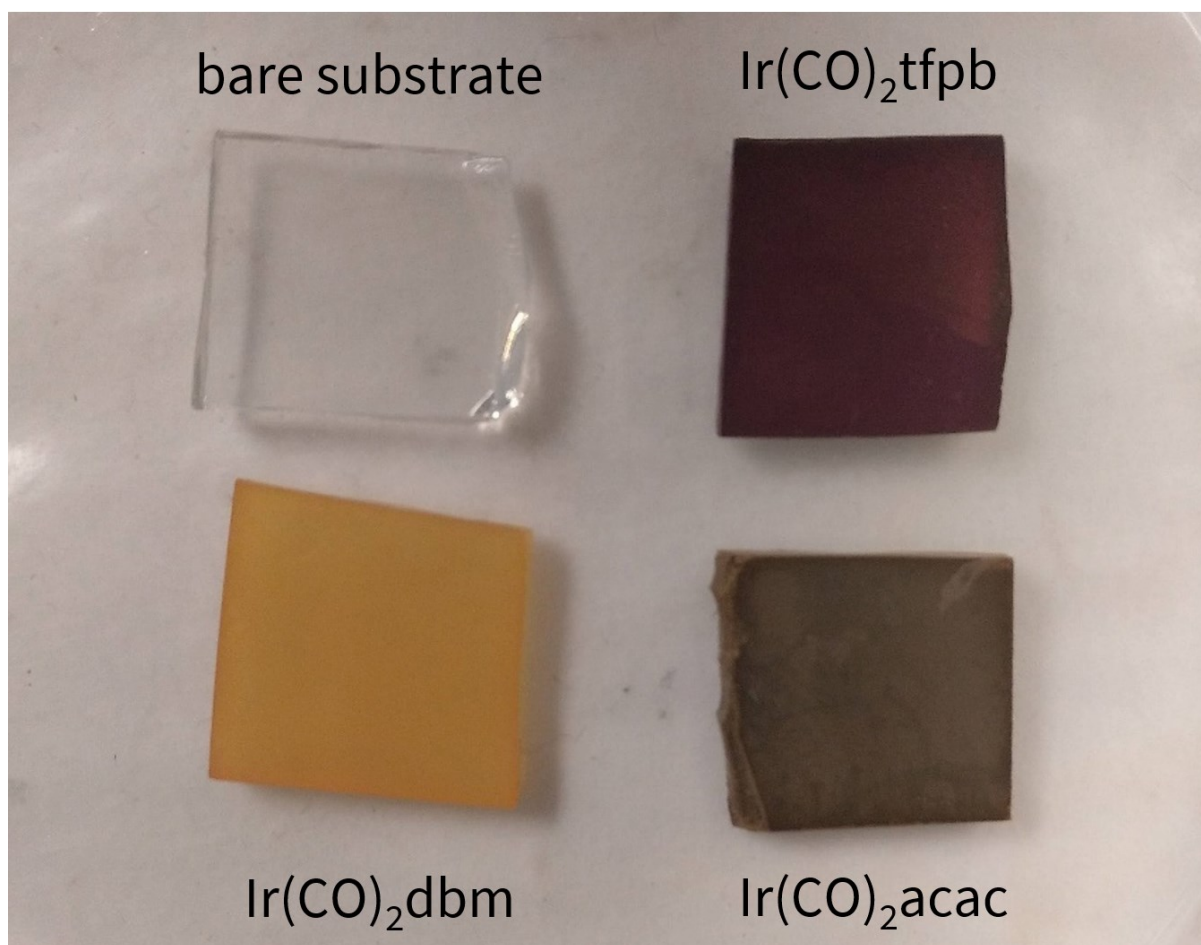

Figure S15: Photographs of vapour-deposited films
